# Supplementary material for: Novel sensor for the determination of CA 15-3 in serum of breast cancer patients based on Fe–gallic acid complex doped in modified cellulose polymer thin films
Source: Royal Society of Chemistry journal article supplement (doi:10.1039/d3ra02495d), 2023-01-01
Supplement: d3ra02495d1.pdf [file d3ra02495d1.pdf]

## **Novel Sensor for the determination of CA 15-3 in Serum of Breast Cancer patients based on Fe-Gallic Acid complex doped in modified Cellulose polymer thin film**

Hind A. AlGhamdi<sup>1</sup>, Yasmeen M. AlZahrani<sup>1</sup>, Salha Alharthi<sup>1</sup>, Mohamed S. Mohy-Eldin<sup>2</sup>, Ekram H. Mohamed<sup>3</sup>, Safwat A. Mahmoud<sup>\*,4</sup>, Mohamed S. Attia<sup>5\*</sup>

### **S1.1. FTIR**

Investigation of the functional groups in Modified CMC membrane was carried out compared to its neat polymer using FTIR analysis

### **S1.2. Differential scanning calorimetry (DSC)**

Differential scanning calorimetric analysis of Modified CMC membrane was carried out in comparison with its neat polymer (~ 5 mg in sealed Al-pan) using Differential Scanning Calorimeter device (Shimadzu DSC –50, Japan) in the temperature range from 20–300 °C at a heating rate of 10 °C/ min under nitrogen flow (30 ml/min).

DSC experiments were used to finalize the thermal characterization as presented in S1.2. The findings were in good alliance with what have been previously reported in the literature. Some modifications in both endothermic/exothermic peaks were noticed between the components of the membrane and their locations. The thermogram exhibited an outside endothermic peak near 100 °C, most probably due to the membrane's moisture content release. The ability of the membrane to hold onto moisture molecules could account for the rise in the endothermic peak. Exothermic peaks were observed between 205 and 240 °C as a result of the breakdown of the pyranose ring of the glucose unit along the polymer chains. After activation, the peak shift to a higher temperature suggested an elevation in the new derivative's thermal stability

### S1.3. Raman spectroscopy analysis

The micro-Raman scattering spectra were recorded with a Renishaw Raman RM1000 equipped with the 532 nm laser line, an electrically refrigerated CCD camera, and a notch filter to eliminate the elastic scattering. The spectra shown here were obtained by using a 25× microscope objective. The output laser power at the samples was about 0.2 mW. The spectral resolution was 4 cm<sup>-1</sup>. The spectral scanning conditions were chosen to avoid sample degradation.

Raman spectroscopy analysis of CMC and its epoxy derivative is shown in Fig. 7. Two samples show characteristic polysaccharide asymmetric and symmetric O–H stretching vibration bands at 3275 and 3401 cm<sup>-1</sup>; A C–H stretching at 2983 cm<sup>-1</sup> will show a stretching vibration of CH<sub>2</sub> at 2833 cm<sup>-1</sup> as it will show a bending vibration at 1400-1422 cm<sup>-1</sup>. The carboxylate ion (COO<sup>-</sup>) appeared at 1610-1740 cm<sup>-1</sup> and near 1315-1435 cm<sup>-1</sup>. The C-O-C stretching vibration range was demonstrated at 890 cm<sup>-1</sup>, while the C-C bond was shown at 540 cm<sup>-1</sup>. Introducing the epoxy group with epichlorohydrin generates significant peaks such as the –CH deformation of the epoxy ring at 804 cm<sup>-1</sup>, the in-plane C-H epoxy deformation at 1198 cm<sup>-1</sup> and the methylene vibration at 2899 cm<sup>-1</sup> [1-3].

[1] M. Choucair, P. Thordarson and J. A. Stride, *Nat. Nanotechnol.*, 2009, 4, 30–33.

[2] K. Sadowska, K. P. Roberts, R. Wisler, J. F. Biernat, E. Jabłowska and R. Bilewicz, *Carbon*, 2009, 47, 1501– 1510.

[3] H. L. Wang, J. Liu and D. J. Qian, *Synth. Met.*, 2012, 162, 881–887.

## S1.4. Surface roughness measurement

The surface roughness measurements of the Modified CMC membrane were compared with its neat polymer utilizing surface roughness tester (model: SJ- 201P), made in Japan. Briefly, samples with an approximate dimension (4cm×5cm) were mounted on a double-sided glass slide. Additionally, all results are the average of six measurements.

## S1.5.FTIR of Fe-Gallic acid

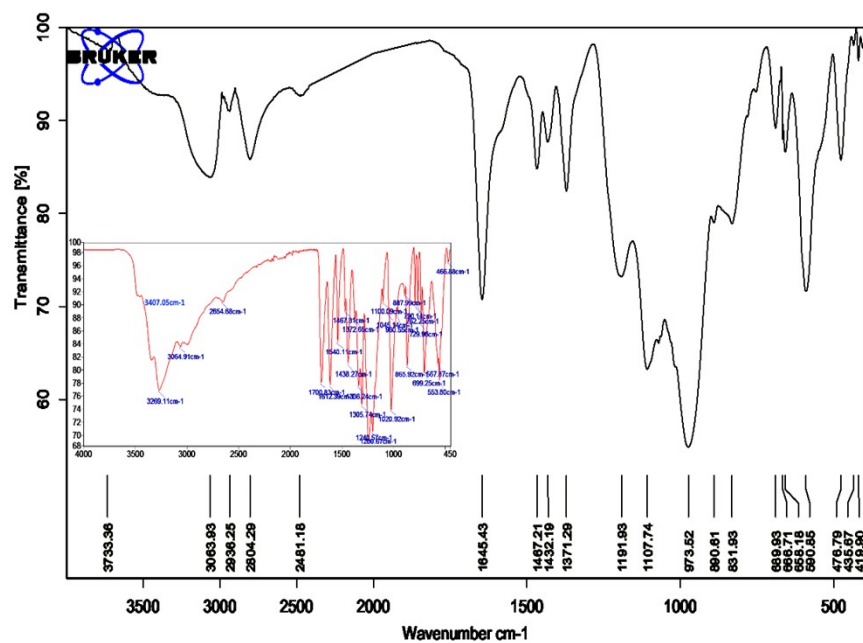

## S1.5. FT-IR of GA (inset) and Fe-GA MOF

### S2.1 : XPS Survey scans

| Name | Peak BE | FWHM, eV | Area (P) CPS., eV | Atomic, % |
|------|---------|----------|-------------------|-----------|
| O1s  | 533.2   | 3.72     | 185924.3          | 34.8      |
| C1s  | 286.04  | 3.71     | 120574.5          | 57.58     |
| S2p  | 169.76  | 3.55     | 13297.49          | 3.6       |
| Fe2p | 711.92  | 6.37     | 32864.01          | 4.02      |

### S2. 2: XPS Fe2p scan

| Name        | Peak BE | FWHM, eV | Area (P) CPS., eV | Atomic % |
|-------------|---------|----------|-------------------|----------|
| Fe2p        | 710.66  | 3.27     | 2001.67           | 46.21    |
| Fe2p Scan A | 723.96  | 2.69     | 669.17            | 15.61    |
| Fe2p Scan B | 718.14  | 3.37     | 314.58            | 7.3      |
| Fe2p Scan C | 725.59  | 2.2      | 197.36            | 4.61     |
| Fe2p Scan D | 714.38  | 3.37     | 904.92            | 20.95    |
| Fe2p Scan E | 728.24  | 3.37     | 227.2             | 5.32     |

### S2. 3: XPS O1s scan

| Name       | Peak BE | FWHM eV | Area (P) CPS., eV | Atomic % |
|------------|---------|---------|-------------------|----------|
| O1s        | 531.73  | 1.71    | 8021.71           | 41.97    |
| O1s Scan A | 533.12  | 1.84    | 5248.4            | 27.48    |
| O1s Scan B | 532.69  | 3.16    | 5835.65           | 30.55    |

#### S2. 4: XPS C1s scan

| Name       | Peak BE | FWHM, eV | Area (P) CPS., eV | Atomic % |
|------------|---------|----------|-------------------|----------|
| C1s        | 284.75  | 1.72     | 8348.15           | 68.73    |
| C1s Scan A | 286.38  | 1.51     | 2146.95           | 17.69    |
| C1s Scan B | 288.60  | 2.17     | 1645.54           | 13.57    |

#### S2. 5: XPS S2p scan

| Name | Peak BE | FWHM, eV | Area (P) CPS., eV | Atomic % |
|------|---------|----------|-------------------|----------|
| S2p  | 168.89  | 2.18     | 1497.2            | 100      |

#### S2. 6: Details of XPS analysis peaks of the Fe(III)-GA-MOF

| XPS Survey scans |          |         |        |            |         |                 |                            |          |           |   |            |      |         |               |            |          |
|------------------|----------|---------|--------|------------|---------|-----------------|----------------------------|----------|-----------|---|------------|------|---------|---------------|------------|----------|
| Name             | Start BE | Peak BE | End BE | Height CPS | FWHM eV | Area (P) CPS.eV | Area (N) KE <sup>0.6</sup> | Atomic % | Peak Type | Q | SF Al Scof | TXFN | Backgnd | PP Height CPS | PP Hgt (N) | PP At. % |
| O1s              | 540.58   | 533.2   | 524.08 | 44803.42   | 3.72    | 185924.31       | 1034.86                    | 34.8     | Standard  | 1 | 2.93       | 1    | Smart   | 48736.37      | 59.68      | 36.76    |
| C1s              | 296.08   | 286.04  | 277.08 | 26422.21   | 3.71    | 120574.52       | 1712.41                    | 57.58    | Standard  | 1 | 1          | 1    | Smart   | 28991.92      | 90.58      | 55.8     |
| S2p              | 175.08   | 169.76  | 163.58 | 3477.95    | 3.55    | 13297.49        | 106.98                     | 3.6      | Standard  | 1 | 1.67       | 1    | Smart   | 3892.77       | 6.89       | 4.24     |
| Fe2p             | 730.08   | 711.92  | 706.08 | 4304.06    | 6.37    | 32864.01        | 336.97                     | 4.02     | Standard  | 1 | 16.42      | 1    | Smart   | 5525.74       | 1.37       | 0.84     |
| XPS Fe2p scan    |          |         |        |            |         |                 |                            |          |           |   |            |      |         |               |            |          |

|                     |        |        |        |         |      |         |        |       |        |   |       |   |       |         |       |       |
|---------------------|--------|--------|--------|---------|------|---------|--------|-------|--------|---|-------|---|-------|---------|-------|-------|
| Fe2p                | 734.98 | 710.66 | 706.48 | 564.02  | 3.27 | 2001.67 | 2.25   | 46.21 | Fitted | 1 | 16.42 | 1 | Smart | 555.69  | 0.62  | 22.18 |
| Fe2p Scan A         | 734.98 | 723.96 | 706.48 | 229.6   | 2.69 | 669.17  | 0.76   | 15.61 | Fitted | 1 | 16.42 | 1 | Smart | 536.15  | 0.61  | 21.61 |
| Fe2p Scan B         | 734.98 | 718.14 | 706.48 | 86.26   | 3.37 | 314.58  | 0.36   | 7.3   | Fitted | 1 | 16.42 | 1 | Smart | 259.36  | 0.29  | 10.41 |
| Fe2p Scan C         | 734.98 | 725.59 | 706.48 | 82.96   | 2.2  | 197.36  | 0.22   | 4.61  | Fitted | 1 | 16.42 | 1 | Smart | 422.92  | 0.48  | 17.08 |
| Fe2p Scan D         | 734.98 | 714.38 | 706.48 | 248.13  | 3.37 | 904.92  | 1.02   | 20.95 | Fitted | 1 | 16.42 | 1 | Smart | 373.51  | 0.42  | 14.95 |
| Fe2p Scan E         | 734.98 | 728.24 | 706.48 | 62.3    | 3.37 | 227.2   | 0.26   | 5.32  | Fitted | 1 | 16.42 | 1 | Smart | 340.4   | 0.39  | 13.77 |
| <b>XPS O1s scan</b> |        |        |        |         |      |         |        |       |        |   |       |   |       |         |       |       |
| O1s                 | 537.28 | 531.73 | 528.28 | 4334.2  | 1.71 | 8021.71 | 44.61  | 41.97 | Fitted | 1 | 2.93  | 1 | Smart | 6126.49 | 17.03 | 35.48 |
| O1s Scan A          | 537.28 | 533.12 | 528.28 | 2635.12 | 1.84 | 5248.4  | 29.21  | 27.48 | Fitted | 1 | 2.93  | 1 | Smart | 5285.24 | 14.71 | 30.63 |
| O1s Scan B          | 537.28 | 532.69 | 528.28 | 1712.68 | 3.16 | 5835.65 | 32.47  | 30.55 | Fitted | 1 | 2.93  | 1 | Smart | 5848.97 | 16.27 | 33.89 |
| <b>XPS C1s scan</b> |        |        |        |         |      |         |        |       |        |   |       |   |       |         |       |       |
| C1s                 | 292.18 | 284.75 | 281.68 | 4474.01 | 1.72 | 8348.15 | 118.48 | 68.73 | Fitted | 1 | 1     | 1 | Smart | 4891.29 | 34.71 | 61.24 |
| C1s Scan A          | 292.18 | 286.38 | 281.68 | 1311.18 | 1.51 | 2146.95 | 30.5   | 17.69 | Fitted | 1 | 1     | 1 | Smart | 2107.22 | 14.97 | 26.4  |
| C1s Scan B          | 292.18 | 288.6  | 281.68 | 701.38  | 2.17 | 1645.54 | 23.4   | 13.57 | Fitted | 1 | 1     | 1 | Smart | 985.2   | 7     | 12.36 |
| <b>XPS S2p scan</b> |        |        |        |         |      |         |        |       |        |   |       |   |       |         |       |       |
| S2p                 | 172.68 | 168.89 | 161.48 | 634.45  | 2.18 | 1497.2  | 12.04  | 100   | Fitted | 1 | 1.67  | 1 | Smart | 676.56  | 4.08  | 100   |

## S2. 7: Details of XRD analysis peaks list of the Fe(III)-GA-MOF

Pos.[°2Th.] Height [cts] FWHMLeft[°2Th.] d-spacing [Å] Rel. Int. [%]

|          |       |        |         |       |
|----------|-------|--------|---------|-------|
| 9.24(5)  | 12(6) | 2.1(2) | 9.56029 | 40.00 |
| 11.84(5) | 55(6) | 2.7(5) | 7.79815 | 74.16 |
| 16.8(5)  | 11(6) | 2.3(3) | 7.2151  | 66.00 |
| 20.1(3)  | 12(4) | 2.1(5) | 5.9214  | 48.14 |
| 23.0(1)  | 11(6) | 2(1)   | 4.2451  | 34.58 |
| 26.5(3)  | 22(4) | 2(1)   | 3.24292 | 12.46 |
| 29.88(1) | 11(7) | 0(1)   | 2.98816 | 22.89 |
| 56.44(5) | 10(6) | 0.2(2) | 1.62891 | 20.31 |
| 58.63(5) | 9(6)  | 0.1(2) | 1.57330 | 16.64 |
| 61.45(9) | 12(3) | 0.6(5) | 1.50762 | 12.82 |
